# Supplementary material for: One-pot synthesis of FeCu–SSZ-13 using Cu–TEPA as the template by adding iron complexes
Source: Royal Society of Chemistry journal article supplement (doi:10.1039/d1cy01479j), 2021-01-01
Supplement: d1cy01479j1.pdf [file d1cy01479j1.pdf]

## Supporting information

### **One-pot synthesis of FeCu-SSZ-13 using Cu-TEPA as the template by adding iron complexes**

Yangfan Ming, Gang Li \*

*State Key Laboratory of Fine Chemicals, School of Chemical Engineering, Dalian University of Technology, Dalian, 116024, China.*

\* Corresponding authors, E-mail: liganghg@dlut.edu.cn (Gang Li)

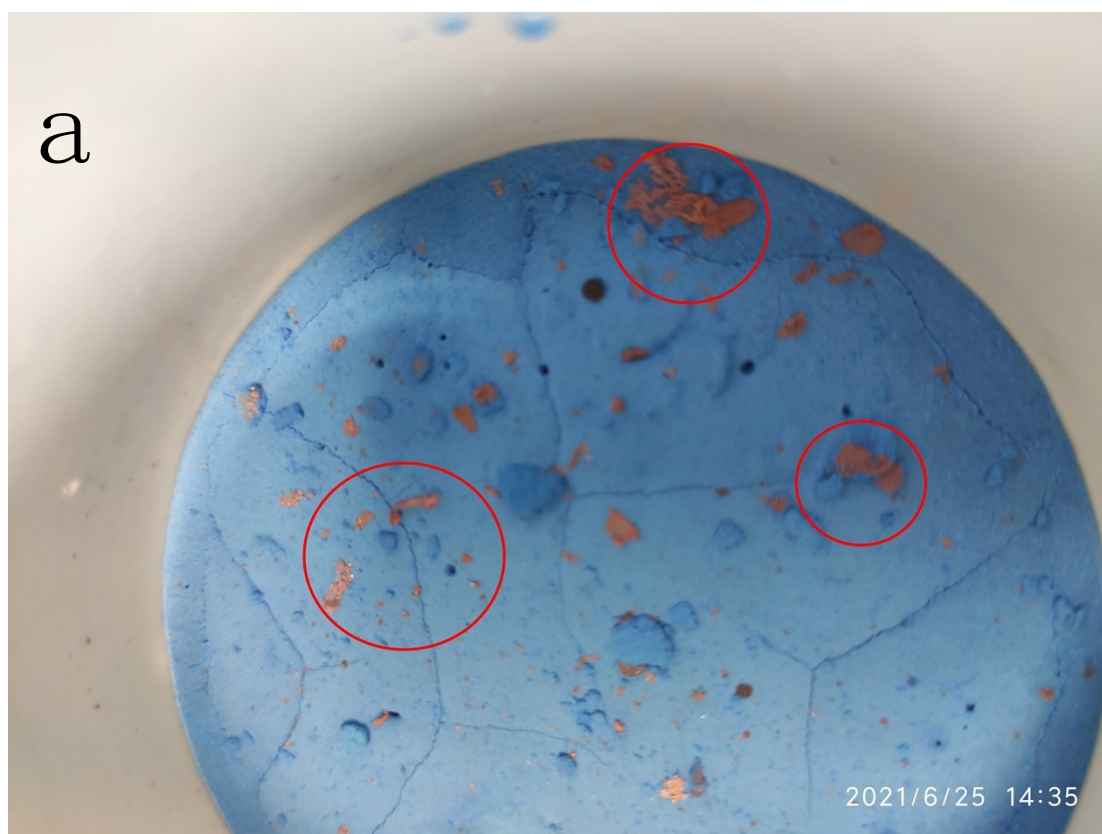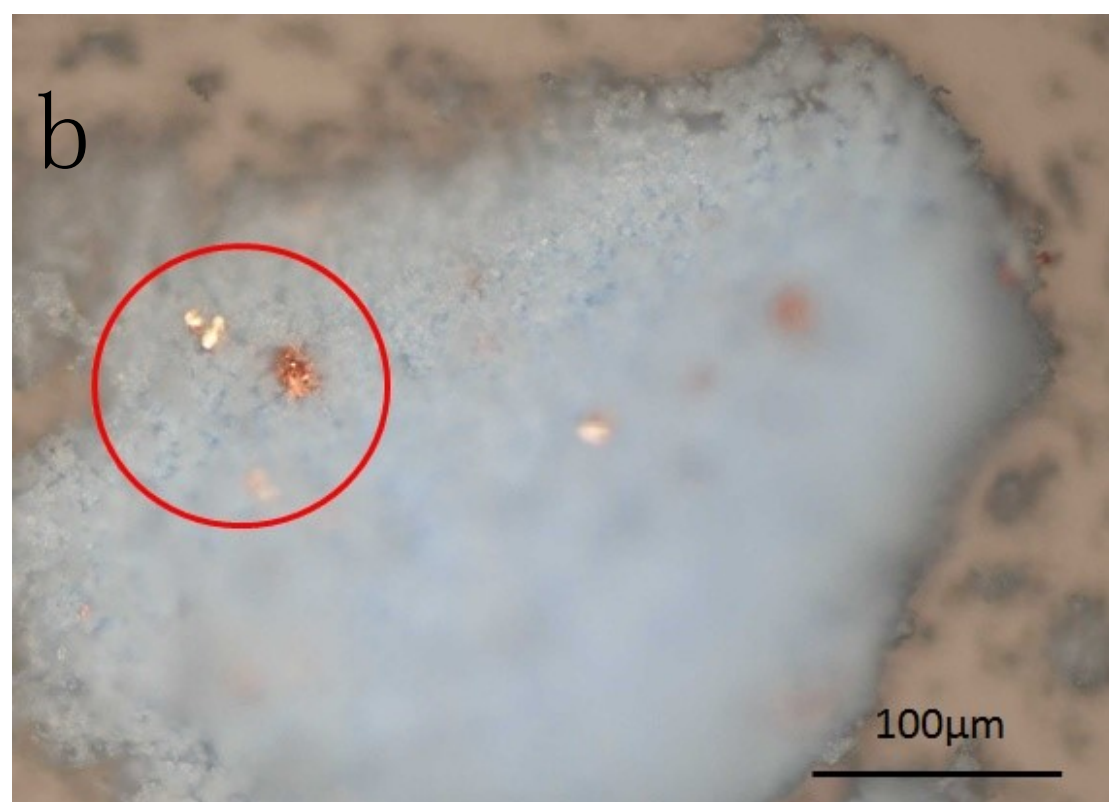

Fig. S1 (a) Photo and (b) micrograph of as-synthesized Cu-CHA-R.

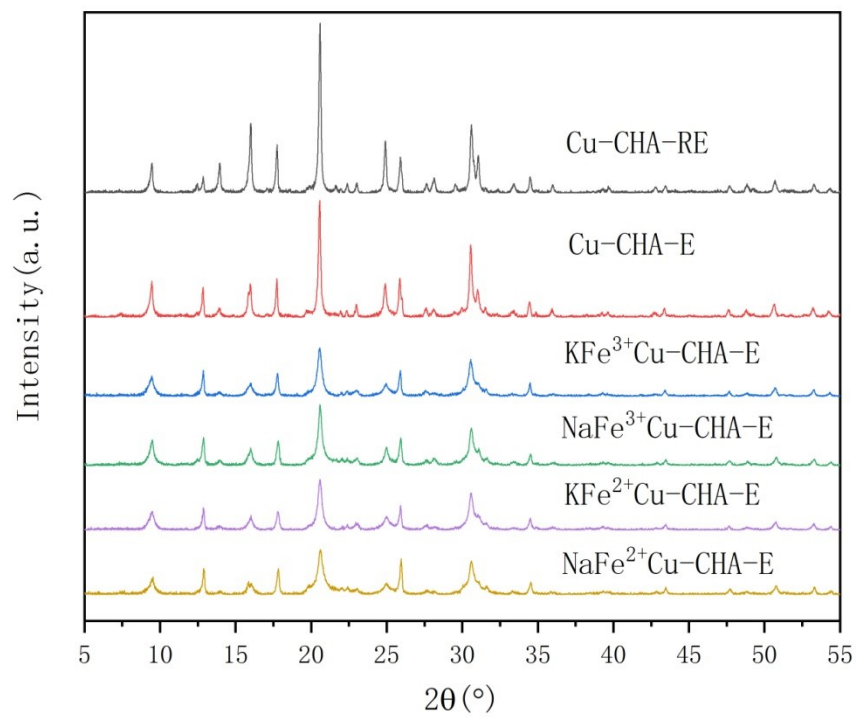

Fig. S2 X-ray diffraction (XRD) patterns of the samples after acid exchange.

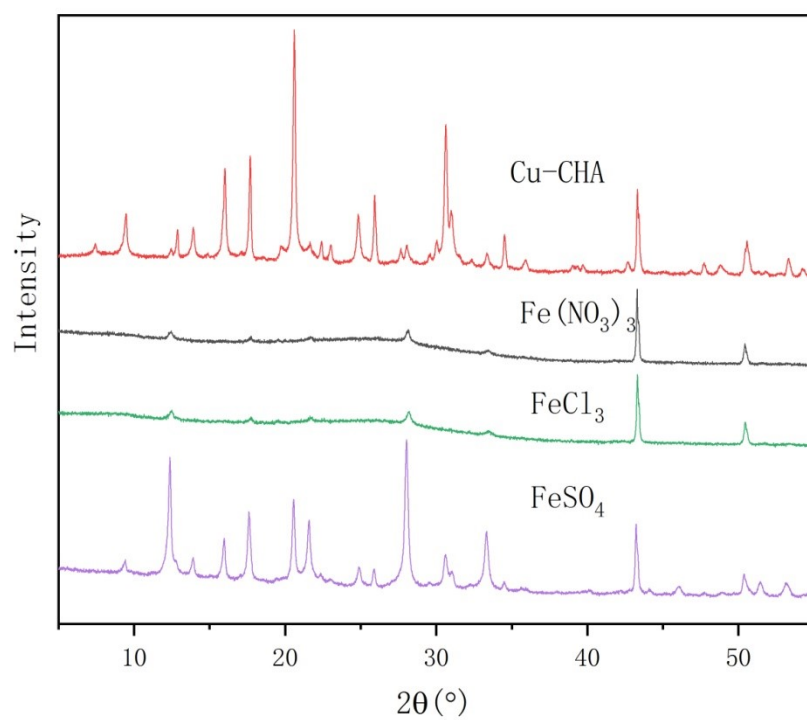

Fig. S3 X-ray diffraction (XRD) patterns of Cu-CHA and the samples synthesized using Fe(NO<sub>3</sub>)<sub>3</sub>, FeCl<sub>3</sub> and FeSO<sub>4</sub> as Fe sources.

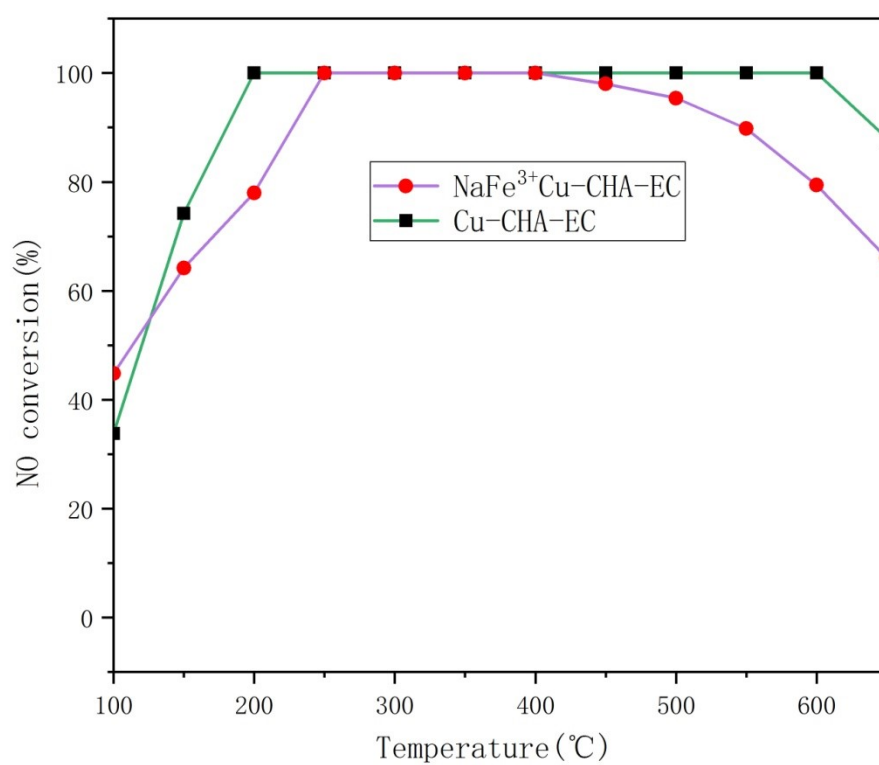

Fig. S4 NO conversion as a function of temperature over the NaFe<sup>3+</sup>Cu-CHA-EC and Cu-CHA-EC catalysts (GHSV=120000 h<sup>-1</sup>).

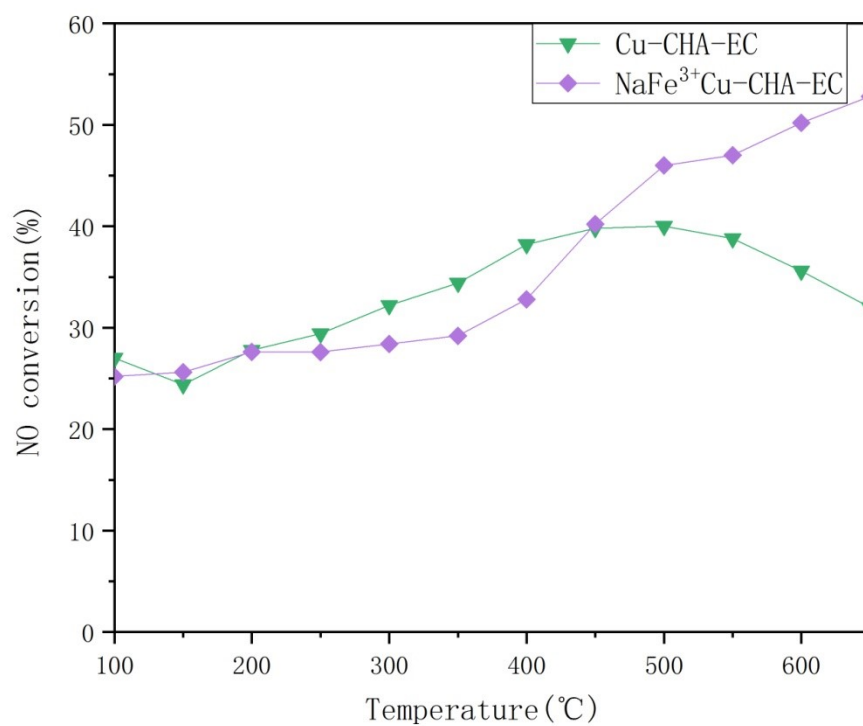

Fig. S5 NO conversion as a function of temperature over NaFe<sup>3+</sup>Cu-CHA-EC and Cu-CHA-EC after hydrothermal aging (GHSV=80000 h<sup>-1</sup>).
